# Supplementary material for: Relationships between Child Development at School Entry and Adolescent Health—A Participatory Systematic Review
Source: MDPI journal article supplement (doi:10.3390/ijerph182111613), 2021-11-04
Supplement: s1 [file s1]

## Additional file 6: Quality Assessment Form

| STUDY ID | Main Author and date | EXTRACTED BY |  | EXTRACTION DATE | DD | MM | YY |
|----------|----------------------|--------------|--|-----------------|----|----|----|
|          |                      |              |  |                 |    |    |    |

## METHODOLOGICAL QUALITY APPRAISAL (adapted from previously used assessments in systematic reviews<sup>1,2</sup>)

### Relationships between child development at school entry and adolescent health: A participatory systematic review

| Quality Assessment Criteria                                                                        | I/V/P | +/-/? |
|----------------------------------------------------------------------------------------------------|-------|-------|
| <b>Study Population</b>                                                                            |       |       |
| 1. Adequate* description of sampling frame <sup>†</sup>                                            | I     |       |
| 2. Participation rate at baseline at least 80%, or evidence that the non-response is not selective | V     |       |
| 3. Adequate* description of baseline study sample <sup>‡</sup>                                     | I     |       |
| <b>Study Attrition</b>                                                                             |       |       |
| 4. Provision of the number of participants at each follow up                                       | I     |       |
| 5. Provision of information on follow-up duration                                                  | I     |       |
| 6. Response at follow up was at least 70% of the number of participants at baseline                | V     |       |
| 7. Not selective non-response during follow-up assessments <sup>‡</sup>                            | V/P   |       |
| <b>Data collection</b>                                                                             |       |       |
| 8. Measurement of exposures using objective or valid and reliable measures <sup>§</sup>            | V     |       |
| 9. Measurement of outcomes using objective or valid and reliable measures <sup>§</sup>             | V     |       |
| <b>Data Analysis</b>                                                                               |       |       |
| 10. Appropriate statistical model used                                                             | V/P   |       |
| 11. The majority of known confounders in the model                                                 | V/P   |       |
| 12. Presentation of point estimates and measures of variability (confidence intervals)             | I     |       |
| <b>Quality Ranking:</b> Low , Moderate , High                                                      |       |       |

\* Adequate = sufficient information to be able to repeat the study.

<sup>†</sup> '+' is given only if adequate information is given in the text on all items.

<sup>‡</sup> '+' is given only if non-selective dropout study sample does not significantly differ from study population on key characteristics or results are adjusted for selective non-response (via appropriate missing data imputation procedures).

<sup>§</sup> (+ = objective or valid/reliable measurements for the relevant measures – author stated validity and reliability and reference)

<sup>^</sup> '+' is given if gender, measure of SES such as family income/Maternal education, maternal mental health and baseline outcome measure at age of exposure (for cross domain only). If a major confounder is missing this is a red flag item and the study is rated low.

I/V/P criterion: Informativeness (relates to clarity of study description), Validity and Precision (relate to risk of bias).

**Notes: Assigning the quality ranking:** V and P criteria should strongly guide the overall quality ranking and carry a greater weight than I. For example all V and P with minimal I would indicate high quality, whereas all I and minimal V and P would indicate low quality

Studies with limited reporting of method or results, those with minimal or no confounders and those with high attrition and no adjustment made for non-response or missing data are judged to have a high risk of bias and rated to be of low methodological quality. Those with adequate reporting, most measurement instruments valid, some confounders and adjustments made for non-response and missing data should be rated as moderate. Those with clear reporting, all measurement instruments valid, a comprehensive list of confounders and adjustments made for non-response and missing data are considered to have a low risk of bias/high quality.

<sup>1</sup> Hoogendoorn WE, van Poppel MN, Bongers PM *et al.* Systematic review of psychosocial factors at work and private life as risk factors for back pain. *Spine (Phila Pa 1976)* 2000; 25: 2114–2125.

<sup>2</sup> te Velde, S.J., van Nassau, F., Uijtendwilligen, L *et al.* Energy balance-related behaviours associated with overweight and obesity in preschool children: a systematic review of prospective studies. *Obesity Reviews*, 2012, 13: 56-74.
