# Supplementary material for: Relationships between Child Development at School Entry and Adolescent Health—A Participatory Systematic Review
Source: MDPI journal article supplement (doi:10.3390/ijerph182111613), 2021-11-04

## Additional File 2: Conceptual Diagram

How does development in the early years of school age children affect health in adolescence in the context of socioeconomic inequality?

Early-Childhood to Early Adolescence (age 3-15)

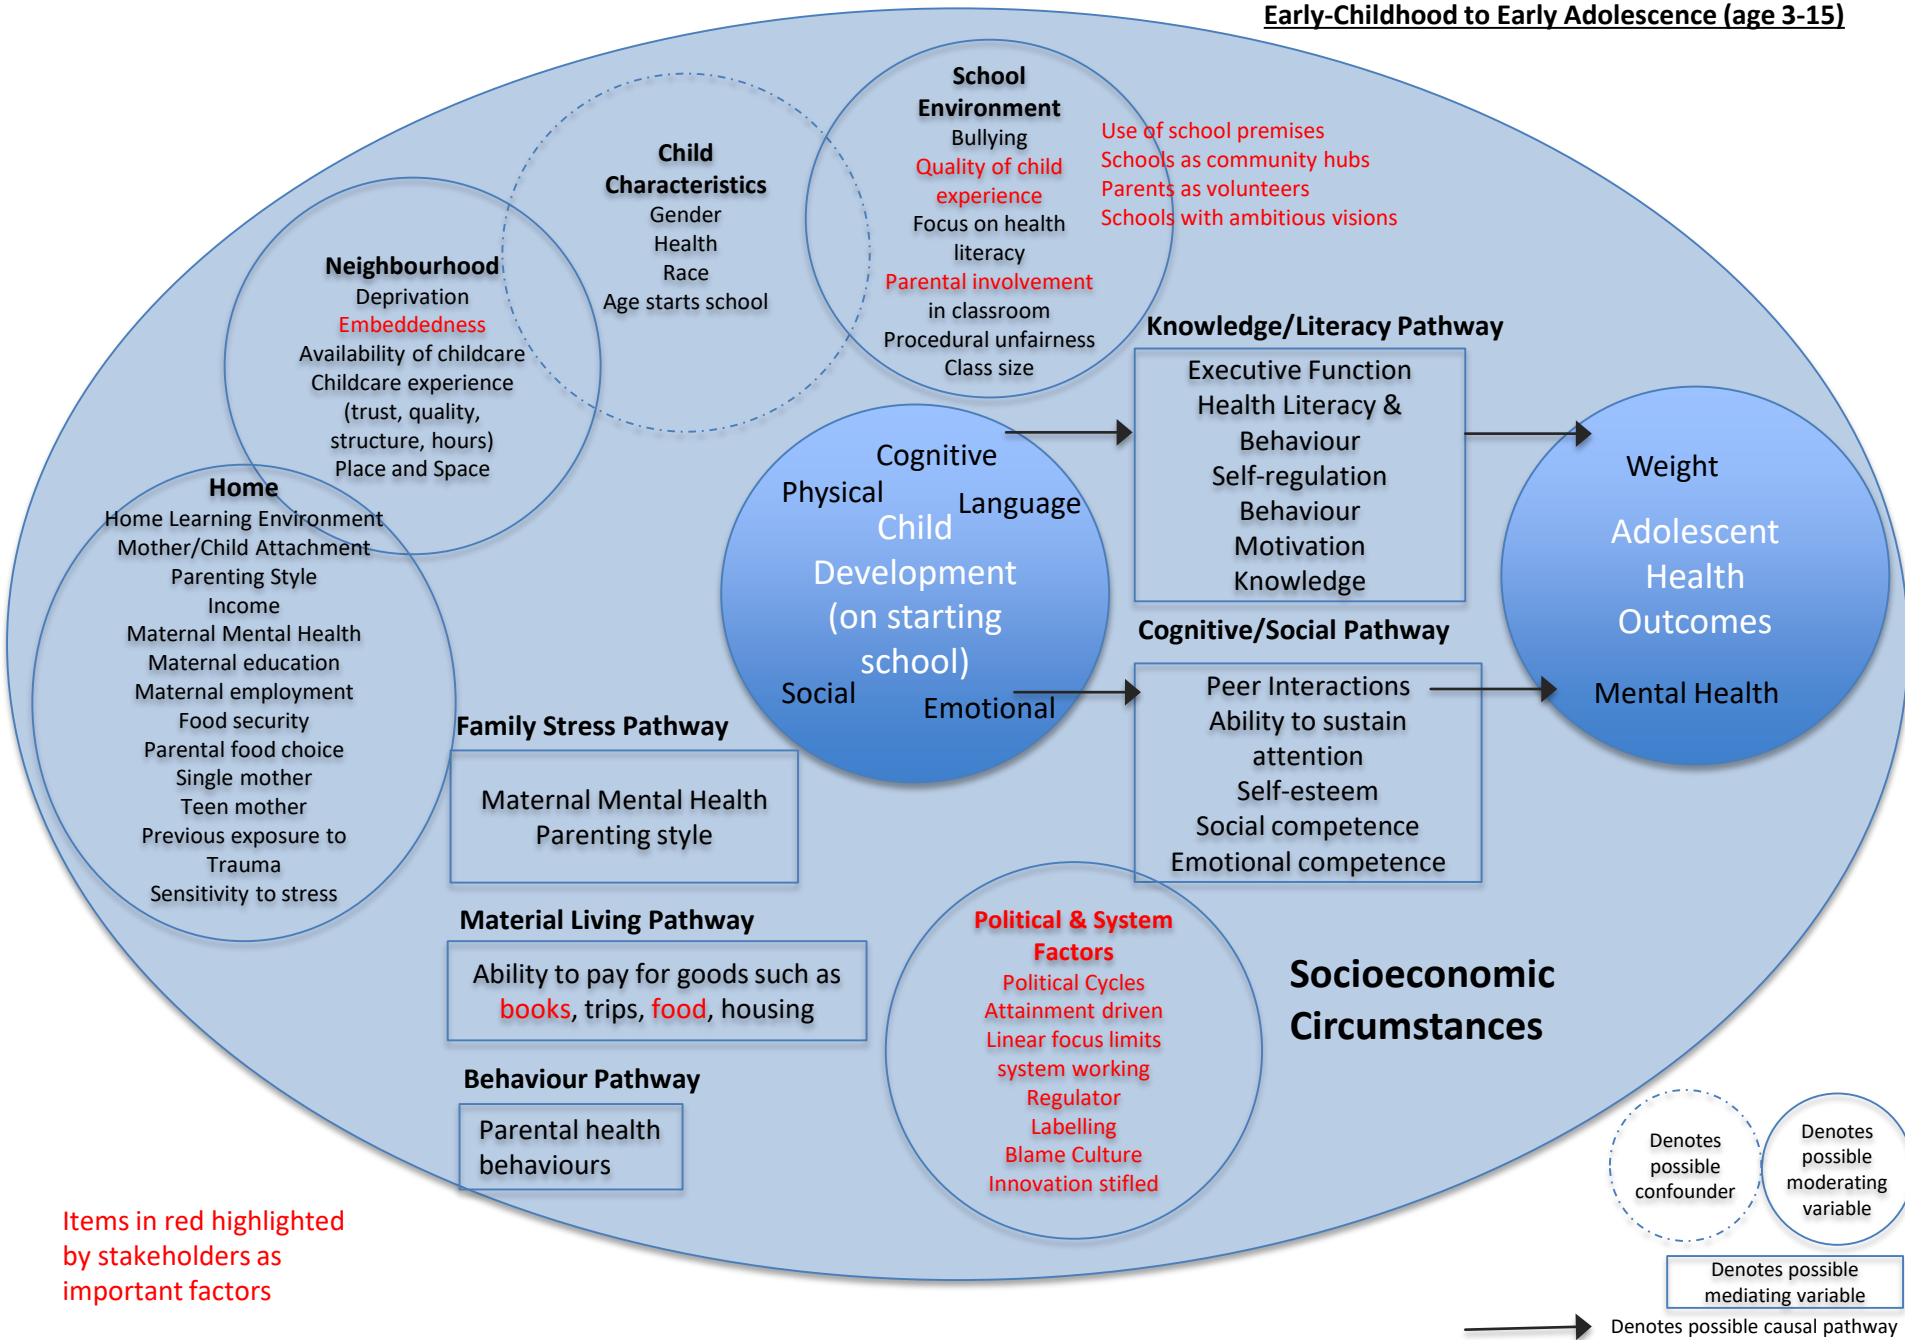

Supplement: s1 [file s1]
