# Supplementary material for: Relationships between Child Development at School Entry and Adolescent Health—A Participatory Systematic Review
Source: MDPI journal article supplement (doi:10.3390/ijerph182111613), 2021-11-04
Supplement: s1 [file s1]

#### Additional file 4: Excluded Studies with Reasons

| Authors                                                                                                                                                  | Year | Title                                                                                                                                          | Journal                                                            | Reason                                         |
|----------------------------------------------------------------------------------------------------------------------------------------------------------|------|------------------------------------------------------------------------------------------------------------------------------------------------|--------------------------------------------------------------------|------------------------------------------------|
| Kouros, C. D., Cummings, E. M. and Davies, P. T.                                                                                                         | 2010 | Early trajectories of interparental conflict and externalizing problems as predictors of social competence in preadolescence                   | Development & Psychopathology                                      | Exposure outside scope                         |
| Leech, Sharon L., Larkby, Cynthia A., Day, Richard and Day, Nancy L.                                                                                     | 2006 | Predictors and Correlates of High Levels of Depression and Anxiety Symptoms among Children at Age 10                                           | Journal of the American Academy of Child and Adolescent Psychiatry | Exposure outside scope                         |
| Lloyd, Jennifer E. V., Li, Leah and Hertzman, Clyde                                                                                                      | 2010 | Early experiences matter: Lasting effect of concentrated disadvantage on children's language and cognitive outcomes                            | Health & Place                                                     | Exposure outside scope                         |
| Lubans, D. R., Morgan, P. J., Cliff, D. P., Barnett, L. M. and Okely, A. D.                                                                              | 2010 | Fundamental movement skills in children and adolescents: review of associated health benefits                                                  | Sports Medicine                                                    | Systematic review - relevant studies extracted |
| Lucia, V. C. and Breslau, N.                                                                                                                             | 2006 | Family cohesion and children's behaviour problems: a longitudinal investigation                                                                | Psychiatry Research                                                | Exposure outside scope                         |
| Mazza, James J., Abbott, Robert D., Fleming, Charles B., Harachi, Tracy W., Cortes, Rebecca C., Park, Jisuk, Haggerty, Kevin P. and Catalano, Richard F. | 2009 | Early Predictors of Adolescent Depression: A 7-Year Longitudinal Study                                                                         | Journal of Early Adolescence                                       | Exposure outside scope                         |
| McCormack, Jane, Harrison, Linda J., McLeod, Sharynne and McAllister, Lindy                                                                              | 2011 | A Nationally Representative Study of the Association between Communication Impairment at 4-5 Years and Children's Life Activities at 7-9 Years | Journal of Speech, Language, and Hearing Research                  | Subset of children                             |
| D'Onise, K., Lynch, J. W., Sawyer, M. G. and McDermott, R. A.                                                                                            | 2010 | Can preschool improve child health outcomes? A systematic review                                                                               | Social Science & Medicine                                          | Systematic review - relevant studies extracted |
| Dodge, K. A., Godwin, J. and Conduct Problems Prevention Research, Group                                                                                 | 2013 | Social-information-processing patterns mediate the impact of preventive intervention on adolescent antisocial behavior                         | Psychological Science                                              | Subset of children                             |
| El Nokali, N. E., Bachman, H. J. and Votruba-Drzal, E.                                                                                                   | 2010 | Parent involvement and children's academic and social development in elementary school                                                         | Child Development                                                  | Exposure outside scope                         |
| Drake, K., Belsky, J. and Fearon, R. M.                                                                                                                  | 2014 | From early attachment to engagement with learning in school: the role of self-regulation and persistence                                       | Developmental Psychology                                           | Outcome outside scope                          |
| Hedenbro, M.; Rydelius, P. A.                                                                                                                            | 2019 | Children's abilities to communicate with both parents in infancy were related to their social competence at the age of 15                      | Acta Paediatrica                                                   | Exposure outside scope                         |
| Helland, Siri Saugestad; Roysamb, Espen; Wang, Mari Vaage; Gustavson, Kristin                                                                            | 2018 | Language difficulties and internalizing problems: Bidirectional associations from 18 months to 8 years among boys and girls                    | Development and Psychopathology                                    | Outcome outside scope                          |

| Authors                                                                                                                                                              | Year | Title                                                                                                                                                    | Journal                                                          | Reason                                 |
|----------------------------------------------------------------------------------------------------------------------------------------------------------------------|------|----------------------------------------------------------------------------------------------------------------------------------------------------------|------------------------------------------------------------------|----------------------------------------|
| Hendricker, Elise; Reinke, Wendy M.                                                                                                                                  | 2017 | Conceptualizing Family Risk in a Racially/Ethnically Diverse, Low-Income Kindergarten Population                                                         | Contemporary School Psychology                                   | Exposure outside scope                 |
| Hinkley, T.; Timperio, A.; Salmon, J.; Hesketh, K.                                                                                                                   | 2017 | Does Preschool Physical Activity and Electronic Media Use Predict Later Social and Emotional Skills at 6 to 8 Years? A Cohort Study                      | Journal of Physical Activity & Health                            | Exposure outside scope                 |
| Jamnik, M. R.; DiLalla, L. F.                                                                                                                                        | 2019 | Health Outcomes Associated With Internalizing Problems in Early Childhood and Adolescence                                                                | Frontiers in Psychology                                          | Outcome outside age range              |
| Jaspers, M.; de Winter, A. F.; Veenstra, R.; Ormel, J.; Verhulst, F. C.; Reijneveld, S. A.                                                                           | 2012 | Preventive child health care findings on early childhood predict peer-group social status in early adolescence                                           | Journal of Adolescent Health                                     | Exposure outside age range             |
| Kantomaa, Marko T.; Stamatakis, Emmanuel; Kankaanpaa, Anna; Kaakinen, Marika; Rodriguez, Alina; Taanila, Anja; Ahonen, Timo; Jarvelin, Marjo-Riitta; Tammelin, Tuija | 2013 | Physical activity and obesity mediate the association between childhood motor function and adolescents' academic achievement                             | PNAS Proceedings of the National Academy of Sciences of the USA  | Exposure and Outcome outside age range |
| Kim, Hyunah; Chang, Hyein                                                                                                                                            | 2019 | Longitudinal association between children's callous-unemotional traits and social competence: Child executive function and maternal warmth as moderators | Frontiers in Psychology Vol 10 2019, ArtID 379                   | Exposure outside scope                 |
| Mesman, J.; Koot, H. M.                                                                                                                                              | 2000 | Child-reported depression and anxiety in preadolescence: II. Preschool predictors                                                                        | Journal of the American Academy of Child & Adolescent Psychiatry | Exposure outside age range             |
| Miller, A. B.; Machlin, L.; McLaughlin, K. A.; Sheridan, M. A.                                                                                                       | 2020 | Deprivation and psychopathology in the Fragile Families Study: A 15-year longitudinal investigation                                                      | Journal of Child Psychology & Psychiatry & Allied Disciplines    | Exposure outside scope                 |
| Nantel-Vivier, Amelie; Pihl, Robert O.; Cote, Sylvana; Tremblay, Richard E.                                                                                          | 2014 | Developmental association of prosocial behaviour with aggression, anxiety and depression from infancy to preadolescence                                  | Journal of Child Psychology and Psychiatry                       | Exposure outside age range             |
| Oberer, Nicole; Gashaj, Venera; Roebbers, Claudia M.                                                                                                                 | 2018 | Executive functions, visual-motor coordination, physical fitness and academic achievement: Longitudinal relations in typically developing children       | Human Movement Science                                           | Outcome outside scope                  |
| Piche, G.; Fitzpatrick, C.; Pagani, L. S.                                                                                                                            | 2015 | Associations Between Extracurricular Activity and Self-Regulation: A Longitudinal Study From 5 to 10 Years of Age                                        | American Journal of Health Promotion                             | Duplicate data from same author        |
| Piek, J. P.; Barrett, N. C.; Smith, L. M.; Rigoli, D.; Gasson, N.                                                                                                    | 2010 | Do motor skills in infancy and early childhood predict anxious and depressive symptomatology at school age?                                              | Human Movement Science                                           | Exposure outside age range             |
| Pihlakoski, Leena; Sourander, Andre; Aromaa, Minna; Rautava, Paivi; Helenius, Hans; Sillanpaa, Matti                                                                 | 2006 | The continuity of psychopathology from early childhood to preadolescence: A prospective cohort study of 3-12-year-old children                           | European Child & Adolescent Psychiatry                           | Subset of children                     |

| Authors                                                                                                                                                                     | Year | Title                                                                                                                                                                                              | Journal                                                          | Reason                                                     |
|-----------------------------------------------------------------------------------------------------------------------------------------------------------------------------|------|----------------------------------------------------------------------------------------------------------------------------------------------------------------------------------------------------|------------------------------------------------------------------|------------------------------------------------------------|
| Pitzer, M.; Jennen-Steinmetz, C.; Esser, G.; Schmidt, M. H.; Laucht, M.                                                                                                     | 2011 | Prediction of preadolescent depressive symptoms from child temperament, maternal distress, and gender: results of a prospective, longitudinal study                                                | Journal of Developmental & Behavioral Pediatrics                 | Exposure outside age range                                 |
| Prior, M.; Smart, D.; Sanson, A.; Oberklaid, F.                                                                                                                             | 2001 | Longitudinal predictors of behavioural adjustment in pre-adolescent children                                                                                                                       | Australian & New Zealand Journal of Psychiatry                   | Exposure outside age range                                 |
| Rende, Richard D.                                                                                                                                                           | 1993 | Longitudinal relations between temperament traits and behavioral syndromes in middle childhood                                                                                                     | Journal of the American Academy of Child & Adolescent Psychiatry | Exposure outside age range                                 |
| Sanson, Ann; Hemphill, Sheryl A.; Smart, Diana                                                                                                                              | 2004 | Connections between Temperament and Social Development: A Review                                                                                                                                   | Social Development                                               | Literature review but no specific data to ages of interest |
| Seeyave, D. M.; Coleman, S.; Appugliese, D.; Corwyn, R. F.; Bradley, R. H.; Davidson, N. S.; Kaciroti, N.; Lumeng, J. C.                                                    | 2009 | Ability to delay gratification at age 4 years and risk of overweight at age 11 years                                                                                                               | Archives of Pediatrics & Adolescent Medicine                     | Exposure outside scope                                     |
| Sourander, A.; Helstela, L.                                                                                                                                                 | 2005 | Childhood predictors of externalizing and internalizing problems in adolescence. A prospective follow-up study from age 8 to 16                                                                    | European Child & Adolescent Psychiatry                           | Exposure and Outcome outside age range                     |
| Sulik, M. J.; Blair, C.; Mills-Koonce, R.; Berry, D.; Greenberg, M.; Family Life Project, Investigators                                                                     | 2015 | Early Parenting and the Development of Externalizing Behavior Problems: Longitudinal Mediation Through Children's Executive Function                                                               | Child Development                                                | Outcome outside age range                                  |
| te Velde, S. J.; van Nassau, F.; Uijtdewilligen, L.; van Stralen, M. M.; Cardon, G.; De Craemer, M.; Manios, Y.; Brug, J.; Chinapaw, M. J.; ToyBox-study, group             | 2012 | Energy balance-related behaviours associated with overweight and obesity in preschool children: a systematic review of prospective studies                                                         | Obesity Reviews                                                  | Systematic review - relevant studies extracted             |
| Tearne, J. E.; Allen, K. L.; Herbison, C. E.; Lawrence, D.; Whitehouse, A. J.; Sawyer, M. G.; Robinson, M.                                                                  | 2015 | The association between prenatal environment and children's mental health trajectories from 2 to 14 years                                                                                          | European Child & Adolescent Psychiatry                           | Exposure outside age range                                 |
| Tinsley, B. J.                                                                                                                                                              | 1992 | Multiple influences on the acquisition and socialization of children's health attitudes and behavior: an integrative review                                                                        | Child Development                                                | Theory paper but limited relevance to the RQ               |
| Trentacosta, C. J.; Fine, S. E.                                                                                                                                             | 2010 | Emotion Knowledge, Social Competence, and Behavior Problems in Childhood and Adolescence: A Meta-Analytic Review                                                                                   | Social Development                                               | Exposure and Outcome outside age range                     |
| Troller-Renfree, S. V.; Buzzell, G. A.; Bowers, M. E.; Salo, V. C.; Forman-Alberti, A.; Smith, E.; Papp, L. J.; McDermott, J. M.; Pine, D. S.; Henderson, H. A.; Fox, N. A. | 2019 | Development of inhibitory control during childhood and its relations to early temperament and later social anxiety: unique insights provided by latent growth modeling and signal detection theory | Journal of Child Psychology & Psychiatry & Allied Disciplines    | Exposure outside age range                                 |

| Authors                                                                                                                                 | Year | Title                                                                                                                                                | Journal                                                       | Reason                     |
|-----------------------------------------------------------------------------------------------------------------------------------------|------|------------------------------------------------------------------------------------------------------------------------------------------------------|---------------------------------------------------------------|----------------------------|
| Uszynska-Jarmoc, Janina                                                                                                                 | 2007 | Self-Esteem and Different Forms of Thinking in Seven and Nine Year Olds                                                                              | Early Child Development and Care                              | Exposure outside scope     |
| Vazsonyi, A. T.; Huang, L.                                                                                                              | 2010 | Where self-control comes from: on the development of self-control and its relationship to deviance over time                                         | Developmental Psychology                                      | Exposure outside scope     |
| Visser, L.; de Winter, A. F.; Vollebergh, W. A.; Verhulst, F. C.; Reijneveld, S. A.                                                     | 2015 | Do child's psychosocial functioning, and parent and family characteristics predict early alcohol use? The TRAILS Study                               | European Journal of Public Health                             | Exposure outside age range |
| Vlahov, Eric; Baghurst, Timothy M.; Mwavita, Mwarumba                                                                                   | 2014 | Preschool motor development predicting high school health-related physical fitness: A prospective study                                              | Perceptual and Motor Skills                                   | Outcome outside age range  |
| Wang, Cen; Williams, Kate E.; Shahaeian, Ameneh; Harrison, Linda J.                                                                     | 2018 | Early Predictors of Escalating Internalizing Problems across Middle Childhood                                                                        | School Psychology Quarterly                                   | Subset of children         |
| Wang, Yiji; Dix, Theodore                                                                                                               | 2017 | Mothers' Depressive Symptoms in Infancy and Children's Adjustment in Grade School: The Role of Children's Sustained Attention and Executive Function | Developmental Psychology                                      | Exposure outside scope     |
| Warren, A. S.; Goldsmith, K. A.; Rimes, K. A.                                                                                           | 2019 | Childhood gender-typed behavior and emotional or peer problems: a prospective birth-cohort study                                                     | Journal of Child Psychology & Psychiatry & Allied Disciplines | Exposure outside scope     |
| Watts, Tyler W.; Gandhi, Jill; Ibrahim, Deanna A.; Masucci, Michael D.; Raver, C.                                                       | 2018 | The Chicago School Readiness Project: Examining the long-term impacts of an early childhood intervention                                             | PLoS ONE                                                      | Exposure outside scope     |
| Weeks, Murray; Cairney, John; Wild, T.; Ploubidis, George B.; Naicker, Kiyuri; Colman, Ian                                              | 2014 | Early-life predictors of internalizing symptom trajectories in Canadian children                                                                     | Depression and Anxiety                                        | Exposure outside scope     |
| Weeks, Murray; Ploubidis, George B.; Cairney, John; Wild, T.; Naicker, Kiyuri; Colman, Ian                                              | 2016 | Developmental pathways linking childhood and adolescent internalizing, externalizing, academic competence, and adolescent depression                 | Journal of Adolescence                                        | Outcome outside age range  |
| Wirt, T.; Hundsorfer, V.; Schreiber, A.; Kesztyus, D.; Steinacker, J. M.; Komm mit in das gesunde Boot - Grundschule" - Research, Group | 2014 | Associations between inhibitory control and body weight in German primary school children                                                            | Eating Behaviors                                              | Study design               |
| Woodward, L. J.; Lu, Z.; Morris, A. R.; Healey, D. M.                                                                                   | 2017 | Preschool self regulation predicts later mental health and educational achievement in very preterm and typically developing children                 | Clinical Neuropsychologist                                    | Exposure outside age range |
| Xue, Y.; Leventhal, T.; Brooks-Gunn, J.; Earls, F. J.                                                                                   | 2005 | Neighborhood residence and mental health problems of 5- to 11-year-olds                                                                              | Archives of General Psychiatry                                | Exposure outside scope     |
| Sabol, T. J.; Pianta, R. C.                                                                                                             | 2011 | Patterns of School Readiness Forecast Achievement and Socioemotional Development at the End of Elementary School                                     | Child Development                                             | Study design               |
