# Supplementary material for: Relationships between Child Development at School Entry and Adolescent Health—A Participatory Systematic Review
Source: MDPI journal article supplement (doi:10.3390/ijerph182111613), 2021-11-04
Supplement: s1 [file s1]

### Additional file 3: Search Strategy for Relationships between child development at school entry and adolescent health – a participatory systematic review

| Exposure                                                                                                                                                                                          | Outcome                                                                                                                                                                                                                                | Relationship                                                                                 | Studies                                                                                                             |
|---------------------------------------------------------------------------------------------------------------------------------------------------------------------------------------------------|----------------------------------------------------------------------------------------------------------------------------------------------------------------------------------------------------------------------------------------|----------------------------------------------------------------------------------------------|---------------------------------------------------------------------------------------------------------------------|
| "school readiness"                                                                                                                                                                                | ((health outcome* or health behavio* or "executive function" or anx* or depress* or "social competence" or "self-esteem" or wellbeing or obesity or weight or "mental health" or health* or diet*) adj3 (child* or adolesc* or teen*)) | (caus* or predict* or assoc* or correlat* or influence* or impact* or improve* or determin*) | (review* or cohort or longitudinal or long-term or "RCT" or "random* control* trial*" or epidemiol* or experiment*) |
| school adj3 read*                                                                                                                                                                                 |                                                                                                                                                                                                                                        |                                                                                              |                                                                                                                     |
| early adj3 educat*                                                                                                                                                                                |                                                                                                                                                                                                                                        |                                                                                              |                                                                                                                     |
| "early child development"                                                                                                                                                                         |                                                                                                                                                                                                                                        |                                                                                              |                                                                                                                     |
| (child develop* adj3 (measure* or outcome*))                                                                                                                                                      |                                                                                                                                                                                                                                        |                                                                                              |                                                                                                                     |
| ((preschool or pre-school) adj4 (dev* or outcome))                                                                                                                                                |                                                                                                                                                                                                                                        |                                                                                              |                                                                                                                     |
| (cognit* adj3 (develop* or skill*) adj3 (child* or primary school*))                                                                                                                              |                                                                                                                                                                                                                                        |                                                                                              |                                                                                                                     |
| (physical adj3 (develop* or skill*) adj3 (child* or primary school*))                                                                                                                             |                                                                                                                                                                                                                                        |                                                                                              |                                                                                                                     |
| (language adj3 (develop* or skill*) adj3 (child* or primary school*))                                                                                                                             |                                                                                                                                                                                                                                        |                                                                                              |                                                                                                                     |
| (emotion* adj3 (develop* or competen*) adj3 (child* or primary school*))                                                                                                                          |                                                                                                                                                                                                                                        |                                                                                              |                                                                                                                     |
| (socioemotion* adj3 (develop* or competen*) adj3 (child* or primary school*))                                                                                                                     |                                                                                                                                                                                                                                        |                                                                                              |                                                                                                                     |
| ((IQ or math* or writing or "test score" or "exam score" or reading or vocabulary or literacy or numeracy or behavio* or self-regulation or achiev* or abilit*) adj3 (child* or primary school*)) |                                                                                                                                                                                                                                        |                                                                                              |                                                                                                                     |

#### Medline (OVID) Search 12 Nov 2020:

Exposure AND Outcome = 13,622

Exposure AND outcome AND Relationship = 10381

Exposure AND outcome AND Relationship AND Studies = 5996

Limit to English language only and the last 30 years = 5734

### Additional file 3: Search Strategy for Relationships between child development at school entry and adolescent health – a participatory systematic review

| Exposure                                                                                                                                                                                          | Outcome                                                                                                                                                                                                                                | Relationship                                                                                 | Studies                                                                                                             |
|---------------------------------------------------------------------------------------------------------------------------------------------------------------------------------------------------|----------------------------------------------------------------------------------------------------------------------------------------------------------------------------------------------------------------------------------------|----------------------------------------------------------------------------------------------|---------------------------------------------------------------------------------------------------------------------|
| "school readiness"                                                                                                                                                                                | ((health outcome* or health behavio* or "executive function" or anx* or depress* or "social competence" or "self-esteem" or wellbeing or obesity or weight or "mental health" or health* or diet*) adj3 (child* or adolesc* or teen*)) | (caus* or predict* or assoc* or correlat* or influence* or impact* or improve* or determin*) | (review* or cohort or longitudinal or long-term or "RCT" or "random* control* trial*" or epidemiol* or experiment*) |
| school adj3 read*                                                                                                                                                                                 |                                                                                                                                                                                                                                        |                                                                                              |                                                                                                                     |
| early adj3 educat*                                                                                                                                                                                |                                                                                                                                                                                                                                        |                                                                                              |                                                                                                                     |
| "early child development"                                                                                                                                                                         |                                                                                                                                                                                                                                        |                                                                                              |                                                                                                                     |
| (child develop* adj3 (measure* or outcome*))                                                                                                                                                      |                                                                                                                                                                                                                                        |                                                                                              |                                                                                                                     |
| ((preschool or pre-school) adj4 (dev* or outcome))                                                                                                                                                |                                                                                                                                                                                                                                        |                                                                                              |                                                                                                                     |
| (cognit* adj3 (develop* or skill*) adj3 (child* or primary school*))                                                                                                                              |                                                                                                                                                                                                                                        |                                                                                              |                                                                                                                     |
| (physical adj3 (develop* or skill*) adj3 (child* or primary school*))                                                                                                                             |                                                                                                                                                                                                                                        |                                                                                              |                                                                                                                     |
| (language adj3 (develop* or skill*) adj3 (child* or primary school*))                                                                                                                             |                                                                                                                                                                                                                                        |                                                                                              |                                                                                                                     |
| (emotion* adj3 (develop* or competen*) adj3 (child* or primary school*))                                                                                                                          |                                                                                                                                                                                                                                        |                                                                                              |                                                                                                                     |
| (socioemotion* adj3 (develop* or competen*) adj3 (child* or primary school*))                                                                                                                     |                                                                                                                                                                                                                                        |                                                                                              |                                                                                                                     |
| ((IQ or math* or writing or "test score" or "exam score" or reading or vocabulary or literacy or numeracy or behavio* or self-regulation or achiev* or abilit*) adj3 (child* or primary school*)) |                                                                                                                                                                                                                                        |                                                                                              |                                                                                                                     |

#### Psychinfo (OVID) Search 12 Nov 2020:

Exposure AND Outcome = 18,836

Exposure AND outcome AND Relationship = 14151

Exposure AND outcome AND Relationship AND Studies = 5455

Limit to English language only and the last 30 years = 5109

### **Additional file 3: Search Strategy for Relationships between child development at school entry and adolescent health – a participatory systematic review**

noft(health outcome\* OR health behavio\* OR "executive function" OR anx\* OR depress\* OR "social competence" OR "self-esteem" OR wellbeing OR obesity OR weight OR "mental health" OR health\* OR diet\*) AND noft(adolesc\* OR child\* OR teen\*) **AND** noft("school readiness" OR school adj3 read\* OR early adj3 educat\* OR "early child development") **AND** noft((caus\* OR predict\* OR assoc\* OR correlat\* OR influence\* OR impact\* OR improve\* OR determin\*))

#### **ASSIA (ProQuest) Search 12 Nov 2020:**

Exposure AND Outcome = 656

Exposure AND outcome AND Relationship = 397

Limit to English language only and the last 30 years = 391

AB ( school readiness or early child development or early adj3 educat\* ) OR AB ( IQ or math\* or writing or "test score" or "exam score" or reading or vocabulary or literacy or numeracy or behavio\* or self-regulation or achiev\* or abilit\* ) AND AB ( child\* or primary school ) **AND** ( adolescents or teenagers or young adults or child\* ) AND AB ( health outcome\* or health behavio\* or "executive function" or anx\* or depress\* or "social competence" or "self-esteem" or wellbeing or obesity or weight or "mental health" or health\* or diet\* ) **AND** AB caus\* or predict\* or assoc\* or correlat\* or influence\* or impact\* or improve\* or determin\* **AND** (review\* or cohort or longitudinal or long-term or "RCT" or "random\* control\* trial\*" or epidemiol\* or experiment\*)

#### **ERIC (EBSCO) Search 12 Nov 2020:**

Exposure AND Outcome = 16330

Exposure AND outcome AND Relationship = 9582

Exposure AND outcome AND Relationship AND Studies = 5455

Limit to English language only and the last 30 years (and journal articles only) = 1307
