# Supplementary material for: Relationships between Child Development at School Entry and Adolescent Health—A Participatory Systematic Review
Source: MDPI journal article supplement (doi:10.3390/ijerph182111613), 2021-11-04
Supplement: s1 [file s1]

## Additional File 9: Results of quality assessment of studies

| Author and Year       | Recruitment | Participation* | Description of baseline characteristics | Participants at follow up | Duration of follow up | Response at follow up* | Not selective non-response* | Exposure measurement* | Outcome measurement* | Analytical model* | Adjustment for confounders* | Measures of variability | Methodological Quality |
|-----------------------|-------------|----------------|-----------------------------------------|---------------------------|-----------------------|------------------------|-----------------------------|-----------------------|----------------------|-------------------|-----------------------------|-------------------------|------------------------|
| Ashford et al 2008    | +           | +              | +                                       | +                         | +                     | +                      | +                           | -                     | +                    | ?                 | -                           | +                       | Moderate               |
| Berthelsen et al 2017 | +           | +              | +                                       | +                         | +                     | -                      | +                           | -                     | +                    | +                 | +                           | +                       | High                   |
| Bornstein et al 2010  | -           | ?              | +                                       | -                         | +                     | +                      | +                           | +                     | +                    | ?                 | -                           | +                       | Moderate               |
| Bornstein et al 2013  | -           | -              | +                                       | -                         | +                     | +                      | +                           | +                     | +                    | ?                 | +                           | +                       | Moderate               |
| Derks et al 2019      | +           | ?              | +                                       | +                         | +                     | +                      | +                           | +                     | +                    | +                 | +                           | +                       | High                   |
| Duchesne et al 2010   | +           | +              | +                                       | +                         | -                     | -                      | +                           | +                     | +                    | +                 | +                           | +                       | High                   |
| Fine et al 2003       | ?           | +              | +                                       | +                         | +                     | +                      | +                           | +                     | +                    | +                 | -                           | -                       | High                   |
| Glaser et al 2011     | +           | +              | +                                       | +                         | +                     | +                      | +                           | +                     | +                    | +                 | +                           | +                       | High                   |
| Gregory et al 2020    | +           | +              | +                                       | +                         | +                     | -                      | +                           | +                     | +                    | +                 | -                           | +                       | Moderate               |
| Hay et al 2003        | +           | -              | +                                       | +                         | +                     | +                      | -                           | +                     | +                    | +                 | -                           | +                       | Low                    |
| Hooper et al 2003     | +           | ?              | +                                       | -                         | +                     | ?                      | ?                           | -                     | +                    | +                 | -                           | +                       | Low                    |
| Howard et al 2018     | +           | +              | +                                       | +                         | +                     | -                      | +                           | +                     | +                    | +                 | +                           | +                       | High                   |
| Howes et al 2000      | +           | +              | +                                       | -                         | -                     | -                      | -                           | +                     | +                    | +                 | -                           | +                       | Low                    |
| Jaspers et al 2010    | +           | +              | +                                       | +                         | +                     | +                      | +                           | -                     | +                    | +                 | -                           | +                       | Moderate               |
| Lecompte et al 2014   | -           | -              | -                                       | +                         | +                     | +                      | -                           | +                     | +                    | ?                 | -                           | +                       | Low                    |
| Lee et al 2017        | +           | +              | +                                       | +                         | +                     | ?                      | -                           | -                     | +                    | +                 | +                           | +                       | Moderate               |
| Louise et al 2012     | +           | -              | +                                       | +                         | +                     | +                      | -                           | +                     | +                    | +                 | -                           | +                       | Moderate               |
| McKenzie et al 2002   | -           | +              | +                                       | +                         | +                     | -                      | ?                           | -                     | +                    | +                 | -                           | +                       | Low                    |

| Author and Year       | Recruitment                                                                  | Participation* | Description of baseline characteristics | Participants at follow up | Duration of follow up | Response at follow up* | Not selective non-response* | Exposure measurement* | Outcome measurement* | Analytical model* | Adjustment for confounders* | Measures of variability | Methodological Quality |
|-----------------------|------------------------------------------------------------------------------|----------------|-----------------------------------------|---------------------------|-----------------------|------------------------|-----------------------------|-----------------------|----------------------|-------------------|-----------------------------|-------------------------|------------------------|
| Meagher et al 2009    | -                                                                            | ?              | +                                       | +                         | +                     | +                      | -                           | -                     | +                    | ?                 | -                           | +                       | Low                    |
| Nelson et al 2018     | +                                                                            | ?              | +                                       | +                         | +                     | +                      | -                           | +                     | +                    | +                 | +                           | +                       | Moderate               |
| Pagani et al 2014     | +                                                                            | -              | +                                       | +                         | +                     | -                      | +                           | +                     | ?                    | +                 | -                           | +                       | Moderate               |
| Pedersen et al 2007   | +                                                                            | +              | +                                       | +                         | +                     | -                      | +                           | -                     | +                    | +                 | -                           | -                       | Low                    |
| Piche et al 2012      | +                                                                            | -              | -                                       | +                         | +                     | +                      | +                           | +                     | -                    | +                 | -                           | +                       | Moderate               |
| Piche et al 2019      | +                                                                            | -              | -                                       | +                         | +                     | ?                      | +                           | -                     | +                    | +                 | +                           | +                       | Low                    |
| Rudasill et al 2014   | +                                                                            | +              | +                                       | +                         | +                     | -                      | +                           | -                     | +                    | +                 | -                           | +                       | Moderate               |
| Rudolph et al 2011    | -                                                                            | +              | +                                       | -                         | +                     | +                      | -                           | -                     | +                    | +                 | -                           | -                       | Low                    |
| Sandstrom et al 2020  | <i>Study design is Meta-Analysis: AMSTAR used as quality assessment tool</i> |                |                                         |                           |                       |                        |                             |                       |                      |                   |                             |                         | Low                    |
| Sasser et al 2017     | +                                                                            | +              | +                                       | +                         | +                     | +                      | +                           | -                     | +                    | +                 | -                           | -                       | Moderate               |
| Shapero et al 2013    | +                                                                            | -              | +                                       | -                         | +                     | +                      | -                           | +                     | +                    | +                 | -                           | +                       | Moderate               |
| Slemming et al 2010   | +                                                                            | -              | +                                       | +                         | +                     | +                      | -                           | -                     | -                    | +                 | +                           | +                       | Moderate               |
| Straatmann et al 2018 | +                                                                            | -              | -                                       | -                         | +                     | +                      | +                           | +                     | +                    | +                 | +                           | +                       | High                   |
| Sutin et al 2017      | +                                                                            | +              | +                                       | +                         | +                     | +                      | +                           | -                     | +                    | +                 | -                           | +                       | High                   |
| Weeks et al 2014      | +                                                                            | -              | +                                       | +                         | +                     | +                      | ?                           | -                     | +                    | +                 | +                           | +                       | Moderate               |
| Yan et al 2018        | +                                                                            | +              | +                                       | -                         | +                     | ?                      | +                           | -                     | +                    | +                 | +                           | +                       | Moderate               |
