# Supplementary material for: Relationships between Child Development at School Entry and Adolescent Health—A Participatory Systematic Review
Source: MDPI journal article supplement (doi:10.3390/ijerph182111613), 2021-11-04
Supplement: s1 [file s1]

## Additional file 5: Data Extraction Form

|                                                                                                                                                                                                                                                                                                                                                                                                                                                                                                                                                                                                      |             |  |     |  |        |  |             |  |                       |   |             |  |        |  |                                                                                                                                                                                                                                                                                                                                                                                                           |                                                                                           |
|------------------------------------------------------------------------------------------------------------------------------------------------------------------------------------------------------------------------------------------------------------------------------------------------------------------------------------------------------------------------------------------------------------------------------------------------------------------------------------------------------------------------------------------------------------------------------------------------------|-------------|--|-----|--|--------|--|-------------|--|-----------------------|---|-------------|--|--------|--|-----------------------------------------------------------------------------------------------------------------------------------------------------------------------------------------------------------------------------------------------------------------------------------------------------------------------------------------------------------------------------------------------------------|-------------------------------------------------------------------------------------------|
| <p><b>Authors:</b></p> <p><b>Country:</b></p> <p><b>Study objectives:</b></p> <p><b>Study design :</b></p> <table border="1"> <tr> <td>Descriptive</td> <td></td> </tr> <tr> <td>RCT</td> <td></td> </tr> <tr> <td>Cohort</td> <td></td> </tr> <tr> <td>Sys. review</td> <td></td> </tr> <tr> <td>Longitudinal Analysis</td> <td>X</td> </tr> <tr> <td>Qualitative</td> <td></td> </tr> <tr> <td colspan="2">Other:</td> </tr> </table> <p><b>Study population:</b> (including gender split and year recruited)</p> <p><b>Contextual factors:</b></p> <p><b>Data collection methods/sources:</b></p> | Descriptive |  | RCT |  | Cohort |  | Sys. review |  | Longitudinal Analysis | X | Qualitative |  | Other: |  | <p><b>Exposure, age and measurement instrument:</b></p> <p><b>Mediating Variables:</b></p> <p><b>Outcomes, age and measurement instrument:</b></p> <p><b>Association and effect size:</b></p> <p><b>Co-variates/Confounders:</b></p> <p><b>Mechanisms between exposure and outcome:</b></p> <p><b>Moderators of the relationship between exposure and outcome:</b></p> <p><b>Summary of Findings:</b></p> | <p><b>Main author conclusions:</b></p> <p><b>Strengths:</b></p> <p><b>Weaknesses:</b></p> |
| Descriptive                                                                                                                                                                                                                                                                                                                                                                                                                                                                                                                                                                                          |             |  |     |  |        |  |             |  |                       |   |             |  |        |  |                                                                                                                                                                                                                                                                                                                                                                                                           |                                                                                           |
| RCT                                                                                                                                                                                                                                                                                                                                                                                                                                                                                                                                                                                                  |             |  |     |  |        |  |             |  |                       |   |             |  |        |  |                                                                                                                                                                                                                                                                                                                                                                                                           |                                                                                           |
| Cohort                                                                                                                                                                                                                                                                                                                                                                                                                                                                                                                                                                                               |             |  |     |  |        |  |             |  |                       |   |             |  |        |  |                                                                                                                                                                                                                                                                                                                                                                                                           |                                                                                           |
| Sys. review                                                                                                                                                                                                                                                                                                                                                                                                                                                                                                                                                                                          |             |  |     |  |        |  |             |  |                       |   |             |  |        |  |                                                                                                                                                                                                                                                                                                                                                                                                           |                                                                                           |
| Longitudinal Analysis                                                                                                                                                                                                                                                                                                                                                                                                                                                                                                                                                                                | X           |  |     |  |        |  |             |  |                       |   |             |  |        |  |                                                                                                                                                                                                                                                                                                                                                                                                           |                                                                                           |
| Qualitative                                                                                                                                                                                                                                                                                                                                                                                                                                                                                                                                                                                          |             |  |     |  |        |  |             |  |                       |   |             |  |        |  |                                                                                                                                                                                                                                                                                                                                                                                                           |                                                                                           |
| Other:                                                                                                                                                                                                                                                                                                                                                                                                                                                                                                                                                                                               |             |  |     |  |        |  |             |  |                       |   |             |  |        |  |                                                                                                                                                                                                                                                                                                                                                                                                           |                                                                                           |
