# Supplementary material for: Relationships between Child Development at School Entry and Adolescent Health—A Participatory Systematic Review
Source: Int J Environ Res Public Health. 2021 Nov 4;18(21):11613. doi: 10.3390/ijerph182111613 (PMC8582847; doi:10.3390/ijerph182111613)
Supplement: Supplementary file 1 [file ijerph-18-11613-s001.zip]

Archive with 9 entries (9 files):
- Additinal File 7 Synthesis-without-Meta-analysis-SWiM-Checklist.pdf
- Additional file 1 PRISMA Checklinst Impact of child dev 2021.pdf
- Additional file 3 Search Strategy Nov 2020.pdf
- Additional file 4 Table of excluded papers with reasons.pdf
- Additional file 5 Data Extraction Form.pdf
- Additional file 6 QA template.pdf
- Additional File 8 table of study characteristics.pdf
- Additional File 9 Results of Quality Assessment of Studies.pdf
- Additional flie 2 Initial Conceptual Model.pdf
